# Protein Kinase C $\epsilon$ Expression in Platelets from Patients with Acute Myocardial Infarction

Cecilia Carubbi<sup>1</sup>, Prisco Mirandola<sup>1</sup>, Maria Mattioli<sup>1</sup>, Daniela Galli<sup>1</sup>, Nicola Marziliano<sup>2</sup>, Piera Angelica Merlini<sup>2</sup>, Daniela Lina<sup>3</sup>, Francesca Notarangelo<sup>3</sup>, Maria Rita Cozzi<sup>4</sup>, Marco Gesi<sup>5</sup>, Diego Ardissino<sup>3</sup>, Luigi De Marco<sup>4</sup>, Marco Vitale<sup>1\*</sup>, Giuliana Gobbi<sup>1</sup>

**1** Department of Biomedical, Biotechnological and Translational Sciences, University of Parma, Parma, Italy, **2** Division of Cardiology, Ospedale Niguarda, Milano, Italy, **3** Division of Cardiology, Azienda Ospedaliero-Universitaria di Parma, Parma, Italy, **4** Department of Laboratory Medicine, CRO National Cancer Institute, Aviano, Italy, **5** Department of Human Morphology and Applied Biology, University of Pisa, Pisa, Italy

## Abstract

**Objective:** Platelets play crucial roles in the pathophysiology of thrombosis and myocardial infarction. Protein kinase C  $\epsilon$  (PKC $\epsilon$ ) is virtually absent in human platelets and its expression is precisely regulated during human megakaryocytic differentiation. On the basis of what is known on the role of platelet PKC $\epsilon$  in other species, we hypothesized that platelets from myocardial infarction patients might ectopically express PKC $\epsilon$  with a pathophysiological role in the disease.

**Methods and Results:** We therefore studied platelet PKC $\epsilon$  expression from 24 patients with myocardial infarction, 24 patients with stable coronary artery disease and 24 healthy subjects. Indeed, platelets from myocardial infarction patients expressed PKC $\epsilon$  with a significant frequency as compared to both stable coronary artery disease and healthy subjects. PKC $\epsilon$  returned negative during patient follow-up. The forced expression of PKC $\epsilon$  in normal donor platelets significantly increased their response to adenosine diphosphate-induced activation and adhesion to subendothelial collagen.

**Conclusions:** Our data suggest that platelet generations produced before the acute event retain PKC $\epsilon$ -mRNA that is not down-regulated during terminal megakaryocyte differentiation. Results are discussed in the perspective of peri-infarctual megakaryocytopoiesis as a critical component of myocardial infarction pathophysiology.

**Citation:** Carubbi C, Mirandola P, Mattioli M, Galli D, Marziliano N, et al. (2012) Protein Kinase C  $\epsilon$  Expression in Platelets from Patients with Acute Myocardial Infarction. PLoS ONE 7(10): e46409. doi:10.1371/journal.pone.0046409

**Editor:** Maurizio Sampaolesi, Stem Cell Research Institute, Belgium

**Received:** July 23, 2012; **Accepted:** August 29, 2012; **Published:** October 5, 2012

**Copyright:** © 2012 Carubbi et al. This is an open-access article distributed under the terms of the Creative Commons Attribution License, which permits unrestricted use, distribution, and reproduction in any medium, provided the original author and source are credited.

**Funding:** This work was supported by FIRB-Accordi di Programma 2010 (IT-Ministry of the University and Scientific and Technological Research/Ministry of Education, University and Research, MIUR), RBAP10KCNS\_002, and by Research program "Ricerca Finalizzata Regione-Università" Regione Emilia Romagna (IT-Ministry of Health). The funders had no role in study design, data collection and analysis, decision to publish, or preparation of the manuscript.

**Competing Interests:** The authors have declared that no competing interests exist.

\* E-mail: marco.vitale@unipr.it

## Introduction

Myocardial infarction (MI) is an atherothrombotic disease determined by the interplay between an individual's genetic background, lifestyle and environment. Atherothrombosis, in turn, is the result of a complex pathological process that is characterized by endothelial dysfunction, atherosclerosis, and finally thrombus formation as the key event of acute MI. Monocytes and platelets are the principal cells involved in these events. Platelets, produced by the cytoplasmic fragmentation of bone marrow megakaryocytes (MK), are essential for primary hemostasis, to repair microvascular damages and to initiate physiological thrombus formation. Calcium mobilization is required for stable platelet incorporation into the developing thrombus. Platelets therefore play a pivotal role in the thrombus formation, as well as in the plaque development [1] from the very beginning of atherosclerotic disease. A variety of platelet functions have been associated with PKC activity [2]. PKC activity, in synergy with Ca<sup>2+</sup>, regulates the secretion of dense and  $\alpha$ -granules following platelet stimulation with phospholipase C-stimulating agonists, like collagen and thrombin [3–5]. Secretion of ADP, fibrinogen, and other stored

compounds, in turn, enhance the activation process [6,7]. PKC-mediated protein phosphorylation also induces the conformational changes of integrin  $\alpha$ Ib $\beta$ 3 required for fibrinogen binding and platelet aggregation [8,9]. Activated integrins, in turn, stimulate PKC via outside-in signaling, resulting in filopodial formation and platelet spreading [10,11]. Ca<sup>2+</sup>-dependent PKC isoforms contribute to platelet aggregation at least in two different ways, directly via integrin phosphorylation and indirectly via granule secretion. It has been reported that PKC is involved in Ca<sup>2+</sup> flux in platelets [3,12], while under flow conditions PKC contributes to the stable adhesion of platelets to collagen but not to their initial attachment to the vessel wall [13]. Finally, it has been demonstrated that platelet PKCs have a dual controlling role in thrombus formation, balancing the proaggregatory and procoagulant properties of thrombi [14] suggesting that the different PKC isoforms present in platelets participate to distinct activatory or suppressive pathways, the latter of which are mediated by one or more non-classical PKC isoforms [14]. Notwithstanding these research efforts, a clear picture of the role of the different PKC isoforms in platelets is still lacking. Human platelets in normal conditions predominantly express four PKC isoforms, namely  $\alpha$ ,

$\beta$ ,  $\delta$ ,  $\theta$  [15,16], which phosphorylate multiple proteins during platelet activation [17,18]. PKC $\delta$  is phosphorylated in response to GPVI and PAR receptors, but not  $\alpha$ IIb $\beta$ 3 activation [19–21]. Differently, PKC $\theta$  is phosphorylated in response to collagen, the snake toxin Alboaggregin A (which interacts with both GPVI and GP-1b-IX-V) and  $\alpha$ IIb $\beta$ 3 [22,23]. The expression of PKC $\epsilon$  in human platelets is still a matter of debate, as most Authors do not find it [11,24], while others reported its presence [22,25]. Among novel PKCs, the expression and function of the epsilon isoform are not thoroughly understood. Although it is now well established that mouse platelets express PKC $\epsilon$  [24], functional data are still contradictory. In platelets from PKC $\epsilon$  null mouse, Pears et al showed a marked inhibition of aggregation and dense granule secretion in response to GPVI agonists but no significant functional change in response to ADP [24]. At the opposite, recently Bynagari-Settipalli et al [26] showed an increase in ADP-induced aggregation and secretion in platelets from PKC $\epsilon$  null mice. Indeed, signaling through GPVI suggests a role for PKC $\epsilon$  in the initial steps of thrombus formation in mouse platelets. Of note, in human monocytes the adhesion to endothelial cells involves PKC $\epsilon$  signaling [27].

Although enucleated, platelets retain cytoplasmic mRNA, accounting for more than 2000 transcripts [28], and maintain functionally intact protein translation capabilities, including an abundant variety of microRNA [29]. On this basis, the emerging concept is that platelet protein synthesis might be relevant in the pathophysiology of acute cardiovascular events [30,31]. Although it has been demonstrated that platelets may retain small pre-mRNA, like Tissue Factor-1 and IL-1 $\beta$  pre-mRNA that can be spliced following *in vitro* platelet activation [32,33], most platelet protein synthesis refers to recent megakaryocytopoiesis.

Therefore, on the basis of: i) the idea that in the progression of the cellular and molecular events that characterize acute MI, the platelets generated around the acute event might be characterized by a specific profile of gene expression; ii) our previous works on PKC $\epsilon$  expression during MK differentiation [34,35] and erythroid differentiation [36,37]; iii) the functional data on platelet PKC $\epsilon$  available in the mouse, we hypothesized that an ectopic expression of PKC $\epsilon$  might be present in platelets from MI patients.

## Methods

### Patients

Three groups of subjects were studied: 1) twenty-four acute myocardial infarction patients (MI) with an ST-segment elevation; 2) twenty-four patients with newly-diagnosed stable CAD (sCAD) and 3) twenty-four healthy subjects (HD). Patients were enrolled at the Cardiology Division of the Azienda Ospedaliero-Universitaria of Parma after written informed consent was obtained and the study was performed according to the Declaration of Helsinki. The protocol was approved by the unique Local Ethical Committee of the Ospedale Maggiore of Parma and University of Parma. Blood collection from MI patients was accomplished within 12 hours from the acute event (in most cases within 3–4 hours) and before any invasive procedure or pharmacological treatment was performed. Previous antiplatelet therapy was an exclusion criteria in all groups. Patients characteristics and their cardiovascular risk factors are reported in **Table 1**.

Fifty ml of citrate anti-coagulated blood samples were taken from patients and controls (collected in Vacutainers, 3.8% sodium citrate final concentration; BD Vacutainer, Becton Dickinson, San Diego, CA) for subsequent analyses.

### Platelet activation

Aliquots of whole blood samples were stained with anti-CD62p monoclonal antibody (mAb) as a marker of platelet activation and  $\alpha$ -granule release and analyzed by flow cytometry [38]. Briefly, 1:100 PBS-diluted whole blood was incubated with the mAb CD62p-FITC (anti P-selectin, Pharmingen Becton Dickinson, San Diego, CA) in the presence of incremental doses of ADP (0; 1,25; 2,5; 5  $\mu$ M). After 20 min at room temperature, 400  $\mu$ l of 2% buffered paraformaldehyde was added for fixation.

Analysis of the samples was performed by an Epics XL flow cytometer (Beckman Coulter, Fullerton, CA) and the Expo ADC software (Beckman Coulter). In some experiments, the absolute number of surface antigens expressed/cell was calculated. To this purpose, the flow cytometer was calibrated with a set of standardized beads (DAKO, Glostrup, Denmark) each with a known amount of fluorochrome (either FITC or PE) expressed in units of MESF (Molecules of Equivalent Soluble Fluorescein). Thus, a standard curve was constructed by plotting MESF values for the beads against the median channel in which the peak was displayed.

### Platelet purification

All the remaining blood samples were centrifuged at 160 g for 20 minutes at room temperature (RT), to obtain platelet rich plasma (PRP). Platelets were then purified by negative separation using magnetic beads coated with anti-CD45 antibodies (Dyna-beads<sup>®</sup>, Invitrogen, Carlsbad, CA), to deplete nucleated cells. Briefly, PRP were stained with the magnetic beads-coated mAb anti-CD45 for 20 min at RT on a rotator. Purified platelets were washed 3 times in PBS/BSA solution, counted, tested for purity by anti-CD41 staining and flow cytometry analysis (only samples where CD41<sup>+</sup> cells >98% were used), and finally processed for RNA extraction.

### RNA isolation

Highly purified platelets were treated with an appropriate amount of TRIzol<sup>™</sup> (Invitrogen) for cell lysis and RNA extraction, following the manufacturer's protocol. Briefly, chloroform was added to TRIzol<sup>™</sup>-treated samples and centrifuged at 12,000 g for 15 min at 4°C. The aqueous phase, containing RNA, was transferred in a new tube and added with an equal volume of isopropanol. After incubation, the samples were centrifuged at 12,000 g for 15 min at 4°C, to obtain RNA pellets that were washed and resumed in DEPC-treated water for quantification by spectrophotometer.

### Amplification of RNA for PKC $\epsilon$ gene expression analysis

The isolated RNA was both positively and negatively tested for cell population purity by Reverse-Transcription PCR (RT-PCR). A standard set of primers was used to test platelet RNA (amplification of CD41) or contaminant cells RNA (amplification of CD45 for nucleated cells).

Platelet RNA purification was followed by reverse transcription and RT-PCR to yield complementary DNA (cDNA). From the cDNA sample, cRNA was synthesized by *in vitro* transcription (IVT), and then analyzed for PKC $\epsilon$  gene expression. Briefly, 1  $\mu$ g total RNA was reverse transcribed with MMV reverse transcriptase and subjected to PCR amplification to detect CD41, CD45 and PKC $\epsilon$  cDNA.

PCR were performed under the following reaction conditions: 95°C for 30 sec, 56°C for 30 sec, 72°C for 30 sec and a final extension at 72°C for 5 min. We used 35 cycles of amplification. The sequences of primers used for PCR were: **CD41**: 5'-GCAAT

**Table 1.** Demographic characteristics and cardiovascular risk factors.

| Cardiovascular risk factors                     | MI<br>N = 24 (%) | sCAD<br>N = 24 (%) | HD<br>N = 24 (%) |
|-------------------------------------------------|------------------|--------------------|------------------|
| <b>Mean age</b>                                 | 68.38            | 67.66              | 67.38            |
| Median (50 <sup>th</sup> percentile)            | 68.0             | 68.5               | 69.5             |
| <b>Gender</b>                                   |                  |                    |                  |
| -Male                                           | 18 (75.00)       | 16 (66.67)         | 16 (66.67)       |
| -Female                                         | 6 (25.00)        | 8 (33.33)          | 8 (33.33)        |
| <b>Family history of cardiovascular disease</b> |                  |                    |                  |
| -Yes                                            | 7 (29.17)        | 11 (45.84)         | 4 (16.67)        |
| -No                                             | 17 (70.83)       | 13 (54.16)         | 20 (83.33)       |
| <b>Diabetes</b>                                 |                  |                    |                  |
| -Yes                                            | 3 (12.50)        | 5 (20.83)          | 1 (4.16)         |
| -No                                             | 21 (87.50)       | 19 (79.17)         | 23 (95.84)       |
| <b>Smoking</b>                                  |                  |                    |                  |
| -Yes                                            | 20 (83.33)       | 15 (62.50)         | 11 (45.83)       |
| -No                                             | 4 (16.66)        | 9 (37.50)          | 13 (54.17)       |
| <b>Hypertension</b>                             |                  |                    |                  |
| -Yes                                            | 13 (54.16)       | 19 (79.17)         | 14 (58.33)       |
| -No                                             | 11 (45.83)       | 5 (20.83)          | 10 (41.66)       |
| <b>Body mass index</b>                          |                  |                    |                  |
| -normal                                         | 9 (37.50)        | 10 (41.66)         | 10 (41.66)       |
| -pre-obese                                      | 14 (58.33)       | 12 (50.00)         | 12(50.00)        |
| -obese                                          | 1 (4.16)         | 2 (8.33)           | 2 (8.33)         |
| <b>Hypercholesterolemia</b>                     |                  |                    |                  |
| -Yes                                            | 8 (33.33)        | 17 (70.84)         | 5 (20.83)        |
| -No                                             | 16 (66.66)       | 7 (29.16)          | 19 (79.16)       |

doi:10.1371/journal.pone.0046409.t001

GTCGA GGGCT TTGAG-3' (sense) and 5'-GGCTG TTCTT GCTCC GTATC-3' (antisense); **CD45**: 5'-GGAAG TGCTG CAATG TGTCA TT-3' (sense) and 5'-CTTGA CATGC ATACT ATTAT CTGAT GTCA-3' (antisense); **PKCε**: 5'-CAATG GCCTT CTAA GATCA AAA-3' (sense) and 5'-CCTGA GAGATC GATGATC ACATAC-3' (antisense). Primers used for PKCε RT-PCR amplify exon 1 and exon 2 sequences flanking the first intronic sequence of the gene, which is 190,000 bp.

#### Quantitative analysis for PKCε gene expression by Real-Time PCR

Equal quantities of RNA for each sample were retro-transcribed with Malone Murine Leukemia Virus Reverse Transcriptase (Promega, Madison WI, USA) according to manufacturer's instructions. Two μl of 1:1 cDNA dilution were used to perform real-time PCR with GoTaq<sup>®</sup> qPCR master mix (Promega) and 200 nM of each primer in Applied Biosystems StepOne real-time machine (Applied Biosystems, Carlsbad, CA). Each reaction was performed in triplicate and mean Ct values were considered for quantitation. Relative gene expression was analysed using comparative Ct experiment software subset following manufacturer's instructions.

The sequences of primers used for PCR were: **CD41**: 5'-GCAAT GTCGA GGGCT TTGAG-3' (sense) and 5'-GGCTG TTCTT GCTCC GTATC-3' (antisense); **CD45**: 5'-GGAAG TGCTG CAATG TGTCA TT-3' (sense) and 5'-CTTGA CATGC ATACT ATTAT CTGAT GTCA-3' (antisense); **PKCε**:

5'-CACCA TCCAG TTTGA GGAGC-3' (sense) and 5'-CGACC CTGAG AGATC GATGA -3' (antisense).

#### cDNA PKCε sequencing

The coding *PKCε* sequence (*ENST00000306156*; cDNA 11- >397) was amplified from the cDNA as described above and the amplicons underwent direct sequencing analysis performed using the BigDye Terminator Cycle sequencing kit V 3.1 (Applied Biosystems) on a 3130XL Genetic Analyzer (Applied Biosystems), following the manufacturer's directions. Electropherograms were analysed using the SeqScape Software (Applied Biosystems) and sequences were blasted using the CLUSTAL W algorithm ([www.ebi.ac.uk/clustalw](http://www.ebi.ac.uk/clustalw)).

#### Protein extraction and western blot

Total proteins were extracted from 1 ml (450×10<sup>3</sup>/μl) of purified platelets. Briefly, 1 ml of isolated platelets from each sample was collected and centrifuged at 1700 rpm for 10 min. The pellets were then suspended in a cell lysis buffer (50 mM Tris-HCl, pH 7.4; 1% NP-40; 0.25% sodium deoxycholate; 150 mM NaCl; 1 mM EDTA; 1 mM PMSF; 1 mM Na<sub>3</sub>VO<sub>4</sub>; 1 mM NaF) supplemented with fresh protease inhibitors and protein concentration was determined using BCA<sup>™</sup> protein assay kit (Pierce, Rockford, IL). Fifty μg of proteins from each sample were then migrated in 5% SDS-acrylamide gels and blotted onto nitrocellulose filters.

Blotted filters were blocked and incubated with specific primary antibodies diluted as described in manufacturers' protocols. Specifically, rabbit polyclonal anti-PKC $\epsilon$  (Upstate, Lake Placid, NY) and mAb anti- $\beta$ -actin (Sigma, Saint Luis, MO) were diluted 1:5000. Filters were washed and further incubated for 1.5 hours at room temperature with 1:5000 peroxidase-conjugated anti-rabbit or with 1:2000 peroxidase-conjugated anti-mouse IgG (Pierce) in the primary antibody working solution at RT. Specific reactions were revealed with the ECL Supersignal West Pico Chemiluminescent Substrate detection system (Pierce).

### PKC $\epsilon$ protein expression in platelets by flow cytometry

Aliquots of PRP samples were stained with: i) anti-CD41a monoclonal antibody (mAb), as a marker of platelet population; ii) Thiazole Orange (TO), to identify reticulated platelets; iii) rabbit anti-PKC $\epsilon$  monoclonal antibody, to test the presence of PKC $\epsilon$  protein; and analyzed by flow cytometry. Briefly, 200  $\mu$ l of PRP were washed and treated with IntraPrep<sup>TM</sup> Permeabilization Reagent (Immunotech, Marseille, France), following manufacturer's protocol. One-hundred  $\mu$ l of Reagent 1 (fixation reagent) were added to the samples. After 15 min of incubation at room temperature, samples were washed and incubated with 100  $\mu$ l of Reagent 2 (permeabilization reagent), 10  $\mu$ l CD41a-Cy5 (Becton Dickinson, San Diego, CA) and 1  $\mu$ l of affinity purified rabbit anti-PKC $\epsilon$  Ab (Novus Biologicals, Littleton, CO); negative control was incubated with 100  $\mu$ l of Reagent 2, 10  $\mu$ l isotype-matched IgG-Cy5 (Immunotech) and 1  $\mu$ l of an isotype-matched Ab (rabbit IgG, Sigma) for 45 min at room temperature in the dark. After a washing step, 1  $\mu$ l of affinity purified goat anti-rabbit-PE Ab (Beckman Coulter) was added and the samples were incubated for 45 min at room temperature in the dark. Finally, the samples were washed and a solution 10 ng/ml of TO (Sigma) was added, in the presence or absence of 10 mg/ml RNAsi (negative control), and incubated for 30 min at room temperature in the dark and analysed by Flow Cytometry. Working dilutions of all reagents were previously determined with serial dilution tests. All samples were analysed on an FC500 flow cytometer (Beckman Coulter).

### Platelet transfection with PKC $\epsilon$ protein

Human recombinant PKC $\epsilon$  (rhPKC $\epsilon$ ; GenWay Biotech, San Diego, CA) was transfected into purified platelets using Proteojuice protein transfection reagent (Novagen, Podenzano, Italy), according to manufacturer's protocols. For each transfection, 1 ml of PRP was centrifuged at 1800 rpm for 7 min, the supernatant was removed and pellets were washed with serum-free medium. Subsequently, samples were centrifuged at 1800 rpm for 7 min and medium was completely removed. The transfection mixture was prepared as follows: 25  $\mu$ l of serum-free medium were added to 1  $\mu$ g of PKC $\epsilon$  protein (or nothing, as negative control) and 1,25  $\mu$ l of ProteoJuice protein transfection reagent. After 20 min of incubation at room temperature, 225  $\mu$ l of serum-free medium were added to the transfection mixture. Finally, the platelet samples were incubated with the mix at 37°C, 5% CO<sub>2</sub> for 3,5 hours. After transfection, the samples were washed twice with serum-free medium to remove excess protein.

In some experiments, transfected and control platelets were added to platelet-deprived whole blood and aliquots were then used for platelet activation analysis by flow cytometry, as described above.

### Platelet adhesion analysis in shear rate system

Isolated PRP was treated for rhPKC $\epsilon$  transfection, as described above. The procedures to prepare a washed erythrocyte suspensions have been described previously in detail [39]. PRP

containing 2–8  $\times 10^8$  loaded platelets/ml was mixed with washed erythrocytes, to obtain a suspension with hematocrit of 42–45%, and apyrase (grade III; 142 ATPase U/mg of protein; Sigma) was added at the final concentration of 5 ATPase U/ml. The mixture was centrifuged at 1000 *g* for 15 min, the supernatant was discarded and the cell pellet was suspended in plasma. Suspensions of acid-insoluble fibrillar type I collagen from bovine achille tendon (Sigma) in 0.5M acetic acid (pH 2.8) were prepared as previously described [40] and two hundred microliters was used to coat glass coverslips for 60 minutes at 22–25°C in a humidified box. After coating, coverslips were washed with PBS and kept in a moist environment until assembled in a modified Hele-Shaw flow chamber [41]. The flow chamber was positioned on the stage of an inverted microscope equipped with epifluorescent illumination (Diaphot-TMD; Nikon Instech, Shinagawa-ku, Japan), an intensified CCD videocamera (C-2400-87; Hamamatsu Photonics, Shizuoka, Japan), and appropriate filters. The total area of an optical field corresponded to approximately 0.007 mm<sup>2</sup>. Blood cells were aspirated through the chamber with a syringe pump (Harvard Apparatus, Holliston, MA) at a flow rate calculated to obtain the desired wall shear rate at the inlet. Platelet adhesion was measured using blood containing 10  $\mu$ M mepacrine to render platelets fluorescent.

Three negative controls were run for each sample: i) untreated platelets; ii) platelets treated with a PKC $\epsilon$  traslocation inhibitor peptide (Merck KgaA, Darmstadt, Germany) added to the trasfection mixture (1  $\mu$ g of inhibitor peptide) with or, iii) without rhPKC $\epsilon$ . Experiments were recorded in real time on videotape at the rate of 25 frames/s, which resulted in a time resolution of 0.04 s. Selected video sequences were also digitized in real time using a Matrox-Digisuite board (Matrox Graphics Inc., Dorval, Quebec, Canada).

Single frame images were captured from videotapes after an initial blood perfusion for 3 minutes on the different substrates. A threshold was applied to distinguish platelets from the background and the area occupied by all platelets in an image was measured using MicroImage (image-processing software; Tesi-Imaging srl, Venice, Italy).

### Statistical analysis

The variables were compared between the three groups of patients using One Way Anova and Bonferroni t-test for multiple comparisons. Where indicated the variables were compared using Mann-Whitney test. T-test for independent or correlated samples was used to compare some indicated data. All the results are expressed as means plus or minus SD. Chi-square analysis of contingency tables were used for PKC $\epsilon$  mRNA expression analysis of frequency comparison in the three groups. All the statistical tests were performed at the 0.05 p-value.

## Results

### MI patients carry hyper-responsive platelets

It is well known that patients with acute coronary syndromes carry hyper-responsive platelets [42,43] and show systemic platelet activation [43–47]. We therefore first studied the activation state of platelets from a randomly selected sub-group of our patients and their sensitivity to agonistic stimuli. In agreement with the current literature, we found that platelets from MI patients express significantly higher surface levels of p-selectin than those from sCAD patients and healthy donors (**Fig. 1A**). Moreover, in MI patients CD62p expression was induced at significantly higher levels by sub-optimal doses of ADP (**Fig. 1B**).

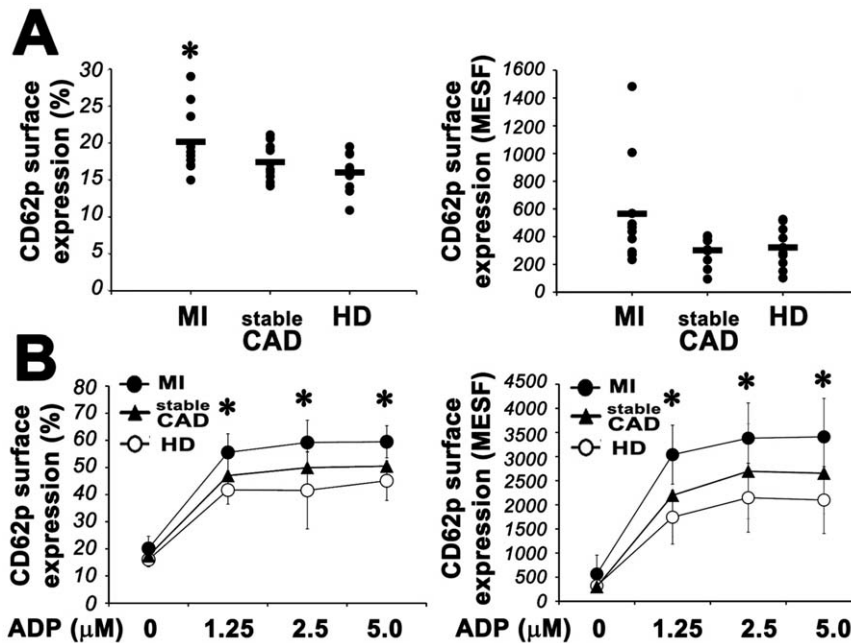

**Figure 1. Platelet activation in MI patients.** **Panel A: Left.** Flow cytometric analysis of platelet CD62p surface expression in patients with MI, sCAD and healthy donors. Cells were stained with specific mAb anti P-selectin, as described in Materials and Methods. Ten patients were analyzed for each group. **Right.** Quantification of CD62p expression on the surface of platelets from MI, sCAD and HD. Absolute numbers of surface antigens expressed/cell (MESF). (Anova and Bonferroni t-test; \*  $P < 0.05$  MI vs HD; no significant differences were found between stable CAD and HD). **Panel B:** Platelet surface expression of CD62p in MI (●), sCAD (▲) and HD (○) patients in the presence of increasing doses of ADP. **Left panel** shows the percentage of positive cells. **Right panel** shows the absolute numbers of surface antigens expressed/cell (MESF). Data from 7 patients of each group are expressed as means  $\pm$  S.D. (Anova and Bonferroni t-test; \*  $P < 0.05$  MI vs HD; no significant differences were found between stable CAD and HD). doi:10.1371/journal.pone.0046409.g001

### Platelets from MI patients contain mRNA for PKC $\epsilon$ and express PKC $\epsilon$

Since PKC $\epsilon$  is finely modulated during megakaryocytopoiesis [34] and is known to increase the response of mouse platelets to GPVI-mediated activation [24], we reasoned that it could be a good candidate to account for the hyper-responsiveness of platelets from MI patients. Therefore, we extracted total mRNA from highly purified platelets and studied the expression of mRNA for PKC $\epsilon$  by RT-PCR. The absence of nucleated cells contamination in the isolated platelet population was assessed by RT-PCR for CD45 expression (Fig. 2A). Moreover, given the dimensions (190 Kb) of the first intronic sequence of the PKC $\epsilon$  gene and the positioning of the primers we use for PKC $\epsilon$  RT-PCR, we could reasonably exclude the presence of PKC $\epsilon$  pre-mRNA in platelets. In agreement with previous data [24], expression of PKC $\epsilon$  mRNA was found at low frequency both in platelets from normal subjects and sCAD patients. On the contrary, platelets from the majority of MI patients (21 out of 24; 87.5%) had a clear-cut expression of PKC $\epsilon$  mRNA (Fig. 2B, C), as confirmed also by qPCR (Fig. 2D). Retrotranscribed cDNA from platelet PKC $\epsilon$  mRNA (MI patients) was bi-directionally sequenced in the region encompassing the exons 1 and 2 (*ENST00000306156*; nucleotides from 11 to 397). Analysis of the sequences and subsequent BLAST analysis revealed a truly concordance of cDNA with PKC $\epsilon$  (Fig. 2E).

We consequently studied the expression levels of PKC $\epsilon$  protein by Western Blot selecting PKC $\epsilon$  mRNA-positive patients from each group (10 patients from the MI group; 5 patients from the sCAD group; 3 subjects from HD group). As expected, accordingly with qPCR results, PKC $\epsilon$  expression in MI patients was about three fold greater than sCAD and healthy subjects (Fig. 3A, B).

To test if this “ectopic” expression of PKC $\epsilon$  in the platelets of MI patients could be attributed to the immature platelet fraction, we analysed by flow cytometry the population of reticulated platelets from MI patients and HD. As reported in Figure 3C, the percentage of platelets from MI patients expressing PKC $\epsilon$  protein was significantly increased both in mature (TO–EPS+) and immature (reticulated) (TO+EPS+) platelet fractions, as compared to HD. More specifically, the ratio between PKC $\epsilon$  positive platelet subsets from MI *vs* HD subjects was  $2.9 \pm 0.73$  in mature platelets (TO–EPS+) and  $2.17 \pm 1.44$  in immature platelets (TO+EPS+) ( $p = 0.48$ , ns).

### Platelets from MI patients during follow up become negative for PKC $\epsilon$ mRNA

To test whether the expression of PKC $\epsilon$  in MI was transient or stable, 11 randomly selected MI patients positive for platelet PKC $\epsilon$  mRNA expression were re-called between day 15 and day 30 from the acute episode and the platelets were tested again for PKC $\epsilon$  expression. All platelet samples were found negative for PKC $\epsilon$  mRNA expression as soon as 15 days from the acute MI episode (not shown).

### PKC $\epsilon$ -expressing platelets are hyper-responsive

To study the correlation between PKC $\epsilon$  expression and platelet activation, we compared the p-selectin (CD62p) cell surface expression in PKC $\epsilon$  positive vs PKC $\epsilon$  negative platelets in all the analysed groups (Fig. 4A). The general trend is a significant higher p-selectin expression in PKC $\epsilon$  positive cells. Subsequently, we tested the platelet reactivity to the stimulation with sub-optimal doses of ADP. As expected, both PKC $\epsilon$  negative and positive platelets were activated, as compared to controls (resting), but the

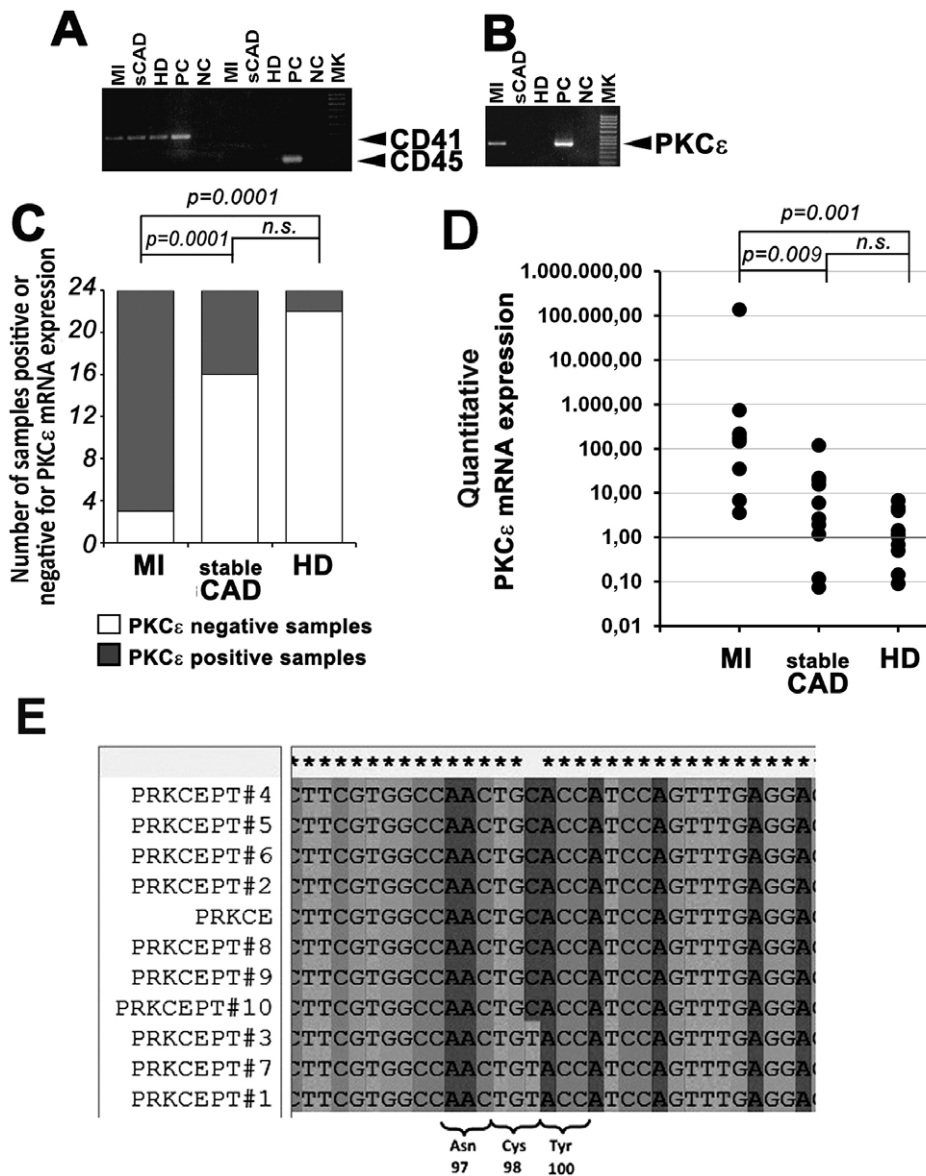

**Figure 2. Platelets from MI patients contain mRNA for PKCε.** **Panel A:** Representative RT-PCR analysis of CD41 and CD45 expression in MI, sCAD and healthy donor platelets. Equal amounts of total cDNA were amplified by PCR to detect the indicated mRNA expression. CD45 is not expressed in isolated platelets, indicating the absence of nucleated cell contaminants. **Panel B:** Representative RT-PCR analysis of PKCε expression in MI, sCAD and healthy donor platelets. Equal amounts of total cDNA were amplified by PCR to detect PKCε mRNA. Platelets from MI patients express PKCε. PC: positive control; NC: negative control. **Panel C:** Analysis of PKCε RNA expression in MI, sCAD and HD platelets. The samples positive to PKCε mRNA expression in MI, sCAD and HD were respectively 21, 8, 3 out of 72 (24 each group) (Chi-square test:  $p = 0.0001$  MI vs HD;  $p = 0.0001$  MI vs sCAD; no significant differences were found between sCAD and HD). **Panel D:** Quantitative analysis of PKCε mRNA expression by real-time PCR. Equal amounts of total cDNA were amplified by PCR. The expression level of PKCε mRNA in each patient was compared with the mean expression in the HD group. Data from 10 patients of each group are shown (Mann Whitney test:  $p = 0.001$  MI vs HD;  $p = 0.009$  MI vs sCAD; no significant differences were found between sCAD and HD). **Panel E:** PKCε sequencing in MI patients. The presence of PKCε was further confirmed in MI patients by bi-directional sequencing. Representative fragment of the cDNA sequences (reverse strand) of PKCε encompassing the exons 1 and 2 (from nucleotide 11 to nucleotide 397). Patients #1, #3 and #7 belonging to the MI group showed the presence (in heterozygosity) of the rs12615152 (c.294C>T, p.Cys98Cys). doi:10.1371/journal.pone.0046409.g002

positive cells were significantly more reactive than the negative (Fig. 4B)

#### PKCε-overexpressing platelets are hyper-responsive and show enhanced adhesion to collagen

To study the functional role of PKCε in platelets, we subsequently decided to force its expression in platelets from

normal healthy donors, in vitro mimicking the in vivo situation. rhPKCε protein was therefore successfully transfected in healthy donor platelets (thus originally negative for PKCε expression) (Fig. 5A). Subsequently, PKCε<sup>+</sup> platelets were functionally assayed for ADP-induced activation and shear stress adhesion, using mock-transfected normal platelets as negative controls.

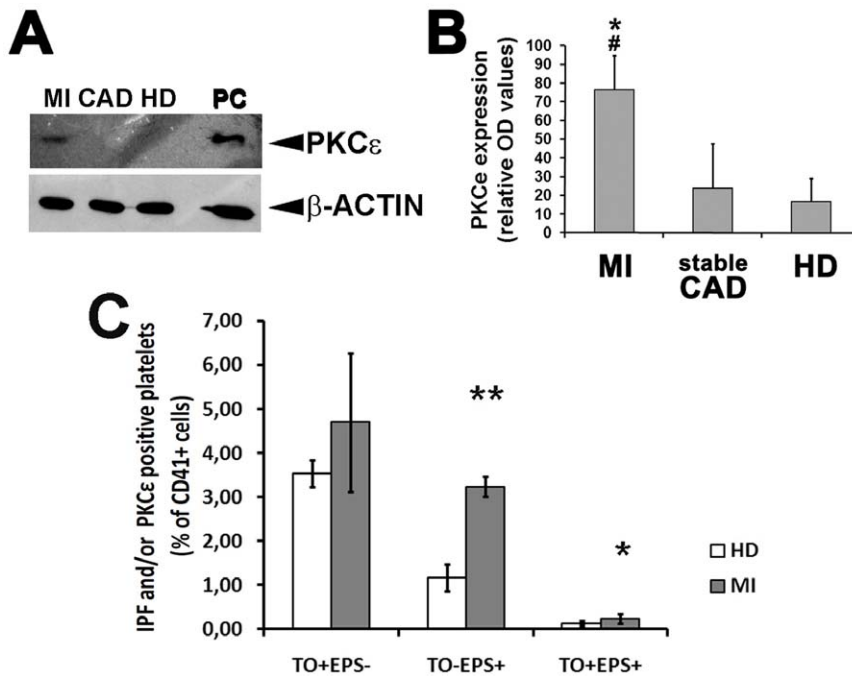

**Figure 3. Platelets from MI patients express PKCε protein.** **Panel A:** A representative Western blot assay for the detection of total PKCε protein expression in platelets from PKCε mRNA-positive MI, sCAD and HD. β-Actin was assayed for protein loading. **Panel B:** Densitometric analysis of PKCε protein expression normalized against β-actin in PKCε mRNA-positive MI, sCAD and HD platelets. Data are expressed as mean ± S.D. (Anova and Bonferroni t-test; \*  $P < 0.05$  MI vs HD; #  $P < 0.05$  MI vs sCAD; no significant differences were found between sCAD and HD). **Panel C:** PKCε protein expression in mature and immature platelets from healthy donors (HD) and MI patients. Cells were simultaneously labelled with Thyazole Orange (TO) - to visualize the immature platelet fraction (IPF) - and anti-PKCε mAb, and analyzed by flow cytometry. Three populations were identified within the CD41+ cell subset: PKCε negative reticulated platelets (TO+EPS-); PKCε positive reticulated platelets (TO+EPS+); PKCε positive mature platelets (TO+EPS+); (Data from 3 patients/group, expressed as means ± S.D. t-Test \*\*  $P < 0.001$ ; \*  $P < 0.05$ ). doi:10.1371/journal.pone.0046409.g003

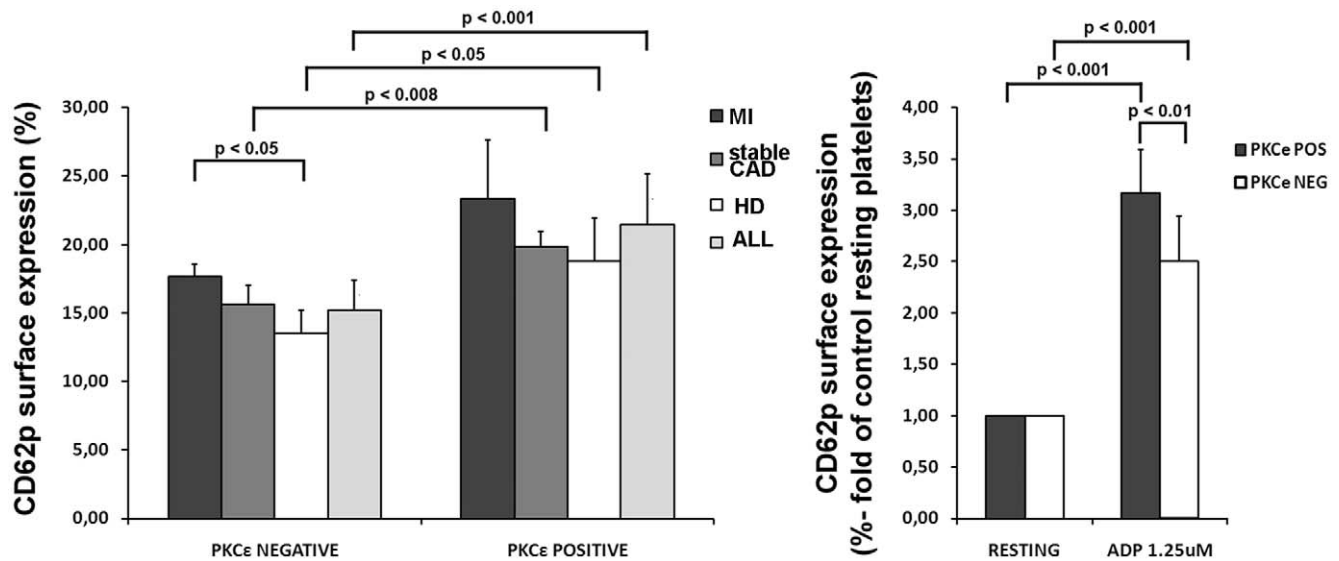

**Figure 4. PKCε protein expression in platelets correlates with their activation levels.** **Panel A:** Flow cytometric analysis of platelet CD62p surface expression in patients with MI, sCAD, healthy donor and in all the sample (ALL), on the basis of PKCε expression. Cells were stained with specific mAb anti P-selectin (CD62p). Seven patients were analyzed for each group (MI: 2 PKCε negative and 5 PKCε positive samples; sCAD: 4 PKCε negative and 3 PKCε positive samples; HD: 4 PKCε negative and 3 PKCε positive samples). Data is expressed as mean ± S.D (Anova and Bonferroni t-test). **Panel B:** Flow cytometric analysis of CD62p surface expression in PKCε negative and positive platelets. Cells were treated with ADP and compared with untreated platelets (resting). Ten patients were analyzed for each group. Data is expressed as mean ± S.D (Anova and Bonferroni t-test). doi:10.1371/journal.pone.0046409.g004

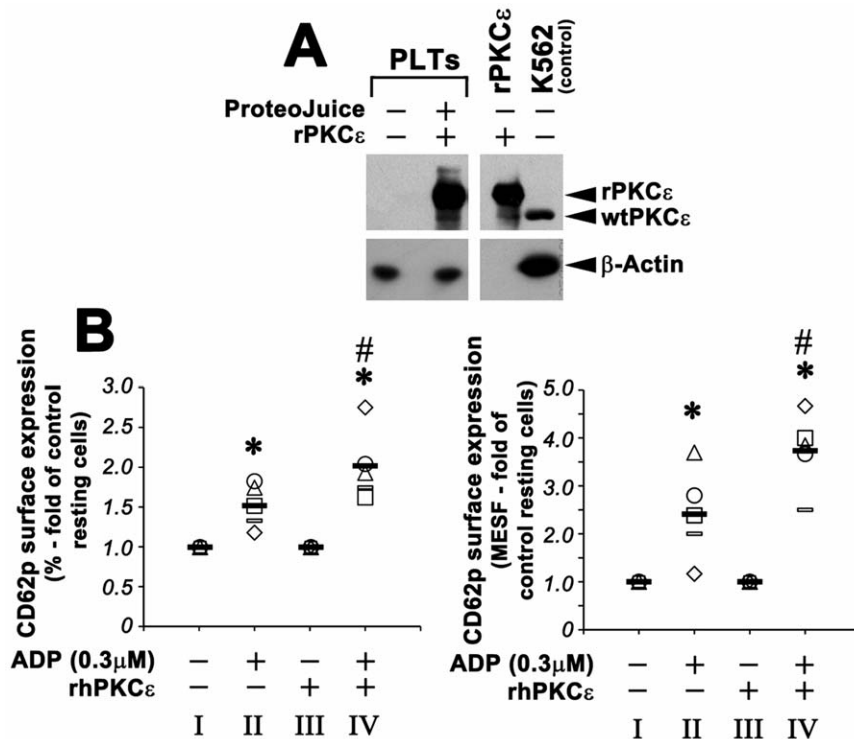

**Figure 5. PKC $\epsilon$  protein transfection in normal platelets induces hyper-responsiveness to ADP-mediated activation. Panel A.** Western blot detection of total PKC $\epsilon$  protein expression in transfected platelets. Healthy donor platelets were incubated with ProteoJuice medium in the presence or absence (negative control) of recombinant PKC $\epsilon$  (rhPKC $\epsilon$ ). K562 cells were used as positive control.  $\beta$ -Actin was assayed for protein loading. **Panel B:** The expression of CD62p on the surface of activated platelets was compared to the expression of CD62p on resting platelets. rhPKC $\epsilon$ -transfected platelets were significantly more reactive than activated control platelets. **Left panel** shows the percentage of positive cells. **Right panel** shows the absolute numbers of surface antigens expressed/cell (MESF). Data from 5 independent experiments (each symbol is related to one experiment) are expressed as means  $\pm$  S.D. (Anova and Bonferroni t-test; \*  $P < 0.05$  activated platelets vs resting platelets – II vs I and IV vs III; #  $P < 0.05$  rhPKC $\epsilon$ -transfected platelets vs activated control platelets – IV vs II). doi:10.1371/journal.pone.0046409.g005

First, PKC $\epsilon$ <sup>+</sup> normal platelets and control platelets were treated with minimal doses of ADP (0.3  $\mu$ M) and analyzed for CD62p surface expression by flow cytometry. There were no significant differences in the surface expression of CD62p between PKC $\epsilon$ <sup>+</sup> normal platelets and control platelets in the absence of ADP stimulation. On the contrary, PKC $\epsilon$ <sup>+</sup> platelets treated with 0.3  $\mu$ M ADP express significantly higher levels of CD62p than control platelets (**Fig. 5B**).

Second, we studied the adhesion to collagen-coated surfaces of PKC $\epsilon$ -overexpressing normal platelets under controlled physiological low (600  $\text{sec}^{-1}$ ) or high (1500  $\text{sec}^{-1}$ ) shear rates. Adhesion to collagen at 1500  $\text{sec}^{-1}$  was significantly increased in normal platelets over-expressing PKC $\epsilon$ , particularly after 3 minutes testing, (**Fig. 6**). Although hampered by a high variability, adhesion at low shear rate also showed a trend to increase. Adhesion of PKC $\epsilon$ -transfected platelets treated with the PKC $\epsilon$  inhibitor was similar to that of untreated platelets, demonstrating the specificity of the observed enhancement.

## Discussion

Platelets play a central role in the genesis and propagation of atherothrombosis and are therefore the target of several therapies for the prevention of thrombosis, particularly in the coronary artery district, where thrombi are the main responsible for myocardial infarction. Platelets are produced by megakaryocytes as anucleated cells that however retain the protein synthesis machinery, some small pre-mRNAs and selective mRNAs that can

therefore be efficiently translated during the platelet life, that lasts around 10 days.

In general, PKC is established as an important regulator of several platelet functions. Of the many known PKC isoforms, not all are physiologically expressed in mature platelets, with some important differences between human and mouse platelets. It is now possible however to associate specific platelet functions to specific PKC isoforms. For instance, Konopatskaya et al. [48] recently demonstrated, using a genetic approach, the key role played by PKC $\alpha$  in  $\alpha$ -granules release and thrombus formation, with no role in platelet adhesion to collagen. On the contrary, absence of PKC $\delta$  and PKC $\theta$  enhances the activation response to GPVI agonists and adhesion to collagen [46]. Moreover, the absence of PKC $\beta$  and  $\theta$  abrogate outside-in signaling via  $\alpha$ IIb $\beta$ 3 integrin [11,23]. Indeed, several receptors involved in platelet activation signal *via* PKC family members, like – for instance – thrombin or the collagen receptor GPVI. As a consequence, pharmacological inhibitors of PKC inhibit platelet aggregation.

In our hands, the majority of HD did not express PKC $\epsilon$  in their platelets. This is in agreement with our previous data [34] describing the down-modulation of PKC $\epsilon$  expression in *in vitro* human megakaryocytopoiesis from day 6 onward of TPO-driven MK differentiation of CD34 precursors. It is interesting however that mouse platelets – on the contrary – express PKC $\epsilon$  at high levels. From the studies in mice we learn that PKC $\epsilon$  plays a relevant role in the activatory signaling cascade emanating from the GPVI receptor. In fact, Pears et al. [24] elegantly demon-



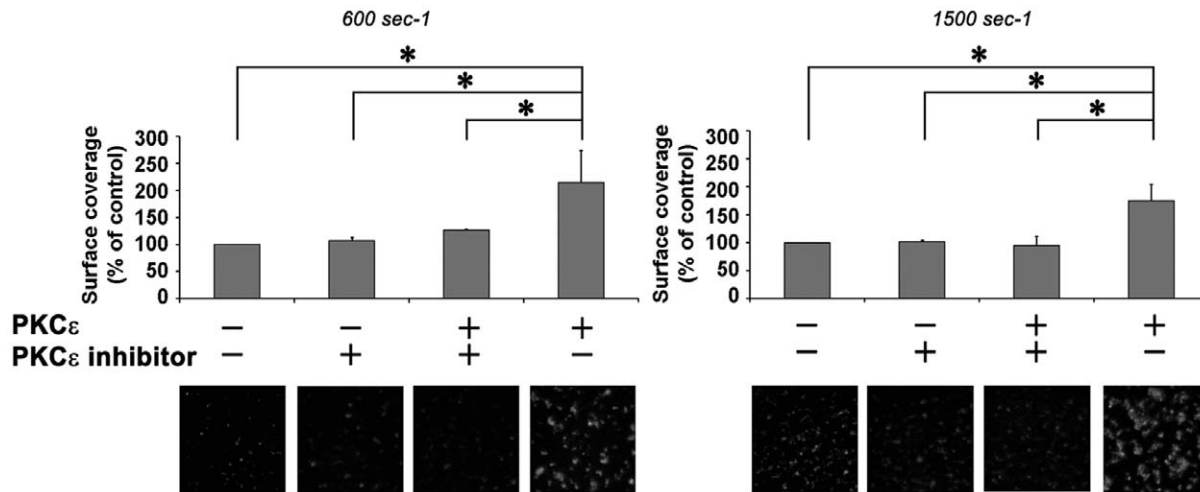

**Figure 6. PKC $\epsilon$  enhances platelet adhesion to fibrillar type I collagen under flow conditions.** rhPKC $\epsilon$ -transfected and control platelets were reconstituted in whole blood, previously deprived from PRP, and tested for their adhesion capacity under flow. Mepacrine-loaded platelets ( $5\text{--}7 \times 10^6/\text{ml}$ ) and washed erythrocytes (hematocrit 42–45%) suspended in plasma, were perfused for 3 minutes over immobilized fibrillar type I collagen. Surface coverage was measured on an area of  $0.07 \text{ mm}^2$  after 3 minutes of perfusion at  $600 \text{ s}^{-1}$  or  $1500 \text{ s}^{-1}$  and is shown as mean  $\pm$  95% confidence intervals of at least 3 separate experiments. Results are shown relative to the values observed in untreated blood cell suspensions (control) (Anova and Bonferroni t-test; \*  $p < 0.01$ ). Representative single-frame images of each surface are also shown. doi:10.1371/journal.pone.0046409.g006

strated a marked reduction in the onset of aggregation and level of ATP secretion in response to collagen in the PKC $\epsilon$  null mouse in the absence of collagen receptor alterations. In particular, the same Authors identify a role for PKC $\epsilon$  in the GPVI signaling pathway, mediated by a reduction of Fc $\gamma$ -chain phosphorylation.

The development of a platelet thrombus in coronary arteries is usually a critical, final phase in atherothrombosis, leading to MI. At the high shear rates typical of small arteries, the initial tethering of platelets at the sites of vascular injury or plaque rupture is mediated by GPIb/V/IX and collagen-immobilized VWF. This interaction – however – has a high off rate, and is not sufficient for stable adhesion and platelet activation, that are the key events for the formation of the thrombus. The shift to stable adhesion requires the subsequent interaction between the platelet and the extracellular matrix proteins, notably between GPVI and collagen [49–51]. GPVI is a signal-transducing, non-integrin collagen receptor that mediates platelet activation, secretion of pro-coagulative factors and surface phosphatidylserine expression that promotes thrombin formation. Interestingly, Bigalke et al. recently demonstrated that platelet surface GPVI expression is already elevated hours before the onset of MI [50]. Genome wide association studies analyzed the *GPVI* gene in detail, finding large differences between populations and a relatively high number of sequence haplotypes which might account for the substantial inter-individual variation in the platelet response to collagen (or to Collagen Related Protein, CRP). Subsequent proteomic studies performed in high, mid and low responders showed something like 1,000 proteins, clustered in patterns, which included signaling as well as trafficking and transmembrane proteins [52]. We show that human platelet PKC $\epsilon$  is selectively *de novo* expressed in MI, but not in sCAD patients, during the acute event while its expression returns negative after 15 days of follow-up. Functionally, we demonstrate that PKC $\epsilon$ -transfected normal human platelets enhance their adhesion properties to collagen-coated surfaces under physiologically high shear forces. MI patients express PKC $\epsilon$  mRNA at significantly higher frequency than HD and sCAD. Considering the dimensions of the first intronic sequence of the

PKC $\epsilon$  gene, that would virtually preclude the persistence of a potential PKC $\epsilon$  pre-mRNA in the platelet, our findings suggest that platelet generations produced before the acute event of MI might retain PKC $\epsilon$ -mRNA that is not down-regulated during terminal MK differentiation. An alternative explanation would be an anticipated release of platelets, before physiological PKC $\epsilon$  down-modulation. This possibility is however unlikely, as PKC $\epsilon$  down-modulation takes place around day 6 of *in vitro* MK differentiation, that would be too early. Besides, the analysis conducted on the reticulated platelets of some MI patients of our cohort did not show any difference in terms of PKC $\epsilon$  expression as compared to mature platelets, excluding the possibility that the appearance of PKC $\epsilon$  positive platelets in MI patients could be selectively ascribed to newly formed platelets.

As a novel PKC isoform, PKC $\epsilon$  would then boost platelet activation responding to DAG generation down-stream the immunoreceptor GPIV-Fc $\gamma$  complex, that signals *via* cytoplasmic PLC $\gamma$ , or any other activating surface receptor that signals *via* phosphoinositides breakdown. To this respect, one could speculate that an ectopic expression of PKC $\epsilon$  accelerates platelet activation and perhaps the inside-out signaling that is essential to form thrombi. From a different perspective, the ectopic expression of PKC $\epsilon$  in platelets could be used as a marker of probability to anticipate the acute event in patients at risk.

## Acknowledgments

We are grateful to Luciana Cerasuolo, Vincenzo Palermo, Domenico Manfredi and Davide Dallatana for technical support.

## Author Contributions

Conceived and designed the experiments: GG PM MV. Performed the experiments: CC MM DG MRC LDM NM MG. Analyzed the data: GG PM MV CC DG. Contributed reagents/materials/analysis tools: MM DG MRC LDM NM MG FN DL. Wrote the paper: GG MV. Selected the patients and organized the clinical work: DA PAM. Treated the patients: DL FN.

## References

- Massberg S, Brand K, Gruner S, Page S, Muller E, et al. (2002) A critical role of platelet adhesion in the initiation of atherosclerotic lesion formation. *J Exp Med* 196: 887–896.
- Harper MT, Poole AW (2007) Isoform-specific functions of protein kinase C: the platelet paradigm. *Biochem Soc Trans* 35: 1005–1008.
- Rink TJ, Sanchez A, Hallam TJ (1983) Diacylglycerol and phorbol ester stimulate secretion without raising cytoplasmic free calcium in human platelets. *Nature* 305: 317–319.
- Walker TR, Watson SP (1993) Synergy between Ca<sup>2+</sup> and protein kinase C is the major factor in determining the level of secretion from human platelets. *Biochem J* 289 (Pt 1): 277–282.
- Yoshioka A, Shirakawa R, Nishioka H, Tabuchi A, Higashi T, et al. (2001) Identification of protein kinase Calpha as an essential, but not sufficient, cytosolic factor for Ca<sup>2+</sup>-induced alpha- and dense-core granule secretion in platelets. *J Biol Chem* 276: 39379–39385.
- Jin J, Kunapuli SP (1998) Coactivation of two different G protein-coupled receptors is essential for ADP-induced platelet aggregation. *Proc Natl Acad Sci U S A* 95: 8070–8074.
- Paul BZ, Jin J, Kunapuli SP (1999) Molecular mechanism of thromboxane A<sub>2</sub>-induced platelet aggregation. Essential role for p2(ac) and alpha(2a) receptors. *J Biol Chem* 274: 29108–29114.
- van Willigen G, Akkerman JW (1991) Protein kinase C and cyclic AMP regulate reversible exposure of binding sites for fibrinogen on the glycoprotein IIb-IIIa complex of human platelets. *Biochem J* 273(Pt 1): 115–120.
- Hers I, Donath J, Lijens PE, van Willigen G, Akkerman JW (2000) Inhibition of platelet integrin alpha(IIb)beta(3) by peptides that interfere with protein kinases and the beta(3) tail. *Arterioscler Thromb Vasc Biol* 20: 1651–1660.
- Hartwig JH, Kung S, Kovacsovic T, Janmey PA, Cantley LC, et al. (1996) D3 phosphoinositides and outside-in integrin signaling by glycoprotein IIb-IIIa mediate platelet actin assembly and filopodial extension induced by phorbol 12-myristate 13-acetate. *J Biol Chem* 271: 32986–32993.
- Buensuceso CS, Oberfell A, Soriani A, Eto K, Kiessens WB, et al. (2005) Regulation of outside-in signaling in platelets by integrin-associated protein kinase C beta. *J Biol Chem* 280: 644–653.
- Rosado JA, Sage SO (2000) Protein kinase C activates non-capacitative calcium entry in human platelets. *J Physiol* 529 Pt 1: 159–169.
- Polanowska-Grabowska R, Gear AR (1999) Activation of protein kinase C is required for the stable attachment of adherent platelets to collagen but is not needed for the initial rapid adhesion under flow conditions. *Arterioscler Thromb Vasc Biol* 19: 3044–3054.
- Strehl A, Munnich IC, Kuipers MJ, van der Meijden PE, Cosemans JM, et al. (2007) Dual role of platelet protein kinase C in thrombus formation: stimulation of pro-aggregatory and suppression of procoagulant activity in platelets. *J Biol Chem* 282: 7046–7055.
- Crosby D, Poole AW (2002) Interaction of Bruton's tyrosine kinase and protein kinase C theta in platelets. Cross-talk between tyrosine and serine/threonine kinases. *J Biol Chem* 277: 9958–9965.
- Khan WA, Blobe G, Halpern A, Taylor W, Wetsel WC, et al. (1993) Selective regulation of protein kinase C isoenzymes by oleic acid in human platelets. *J Biol Chem* 268: 5063–5068.
- Tsukuda M, Asaoka Y, Sekiguchi K, Kikkawa U, Nishizuka Y (1988) Properties of protein kinase C subspecies in human platelets. *Biochem Biophys Res Commun* 155: 1387–1395.
- Quinton TM, Kim S, Dangelmaier C, Dorsam RT, Jin J, et al. (2002) Protein kinase C- and calcium-regulated pathways independently synergize with Gi pathways in agonist-induced fibrinogen receptor activation. *Biochem J* 368: 535–543.
- Murugappan S, Shankar H, Bhamidipati S, Dorsam RT, Jin J, et al. (2005) Molecular mechanism and functional implications of thrombin-mediated tyrosine phosphorylation of PKCdelta in platelets. *Blood* 106: 550–557.
- Moussazadeh M, Haimovich B (1998) Protein kinase C-delta activation and tyrosine phosphorylation in platelets. *FEBS Lett* 438: 225–230.
- Hall KJ, Jones ML, Poole AW (2007) Coincident regulation of PKCdelta in human platelets by phosphorylation of Tyr311 and Tyr365 and phospholipase C signalling. *Biochem J* 406: 501–509.
- Crosby D, Poole AW (2003) Physical and functional interaction between protein kinase C delta and Fyn tyrosine kinase in human platelets. *J Biol Chem* 278: 24533–24541.
- Soriani A, Moran B, de Virgilio M, Kawakami T, Altman A, et al. (2006) A role for PKCtheta in outside-in alpha(IIb)beta3 signaling. *J Thromb Haemost* 4: 648–655.
- Pears CJ, Thornber K, Auger JM, Hughes CE, Grygielska B, et al. (2008) Differential roles of the PKC novel isoforms, PKCdelta and PKCepsilon, in mouse and human platelets. *PLoS One* 3: e3793.
- Murugappan S, Tuluc F, Dorsam RT, Shankar H, Kunapuli SP (2004) Differential role of protein kinase C delta isoform in agonist-induced dense granule secretion in human platelets. *J Biol Chem* 279:2360–2367.
- Bynagari-Settipalli YS, Lakhani P, Jin J, Bhavaraju K, Rico MC, et al. (2012) Protein kinase C isoform  $\epsilon$  negatively regulates ADP-induced calcium mobilization and thromboxane generation in platelets. *Arterioscler Thromb Vasc Biol* 32:1211–1219.
- Gong N, Wei H, Chowdhury SH, Chatterjee S (2004) Lactosylceramide recruits PKCalpha/epsilon and phospholipase A2 to stimulate PECAM-1 expression in human monocytes and adhesion to endothelial cells. *Proc Natl Acad Sci U S A* 101: 6490–6495.
- Gnatenko DV, Dunn JJ, McCorkle SR, Weissmann D, Perrotta PL, et al. (2003) Transcript profiling of human platelets using microarray and serial analysis of gene expression. *Blood* 101: 2285–2293.
- Landry P, Plante I, Ouellet DL, Perron MP, Rousseau G, et al. (2009) Existence of a microRNA pathway in anucleate platelets. *Nat Struct Mol Biol* 16: 961–966.
- Healy AM, Pickard MD, Pradhan AD, Wang Y, Chen Z, et al. (2006) Platelet expression profiling and clinical validation of myeloid-related protein-14 as a novel determinant of cardiovascular events. *Circulation* 113: 2278–2284.
- Raghavachari N, Xu X, Harris A, Villagra J, Logun C, et al. (2007) Amplified expression profiling of platelet transcriptome reveals changes in arginine metabolic pathways in patients with sickle cell disease. *Circulation* 115: 1551–1562.
- Denis MM, Tolley ND, Bunting M, Schwartz H, Jiang H, et al. (2005) Escaping the nuclear confines: signal-dependent pre-mRNA splicing in anucleate platelets. *Cell* 122: 379–391.
- Schwartz H, Tolley ND, Foulks JM, Denis MM, Risenmay BW, et al. (2006) Signal-dependent splicing of tissue factor pre-mRNA modulates the thrombogenicity of human platelets. *J Exp Med* 203: 2433–2440.
- Gobbi G, Mirandola P, Sponzilli I, Micheloni C, Malinverno C, et al. (2007) Timing and expression level of protein kinase C epsilon regulate the megakaryocytic differentiation of human CD34 cells. *Stem Cells* 25: 2322–2329.
- Gobbi G, Mirandola P, Carubbi C, Micheloni C, Malinverno C, et al. (2009) Phorbol ester-induced PKCepsilon down-modulation sensitizes AML cells to TRAIL-induced apoptosis and cell differentiation. *Blood* 113: 3080–3087.
- Bassini A, Zauli G, Migliaccio G, Migliaccio AR, Pascuccio M, et al. (1999) Lineage-restricted expression of protein kinase C isoforms in hematopoiesis. *Blood* 93: 1178–1188.
- Mirandola P, Gobbi G, Ponti C, Sponzilli I, Cocco L, et al. (2006) PKCepsilon controls protection against TRAIL in erythroid progenitors. *Blood* 107: 508–513.
- Solinas E, Gobbi G, Dangas G, Mehran R, Fahy M, et al. (2009) Comparison of the effects of pretreatment with tirofiban, clopidogrel or both on the inhibition of platelet aggregation and activation in patients with acute coronary syndromes. *J Thromb Thrombolysis* 27: 36–43.
- Mazzucato M, Cozzi MR, Pradella P, Ruggeri ZM, De Marco L (2004) Distinct roles of ADP receptors in von Willebrand factor-mediated platelet signaling and activation under high flow. *Blood* 104: 3221–3227.
- Folie BJ, McIntire LV, Lasslo A (1988) Effects of a novel antiplatelet agent in mural thrombogenesis on collagen-coated glass. *Blood* 72: 1393–1400.
- Savage B, Almus-Jacobs F, Ruggeri ZM (1998) Specific synergy of multiple substrate-receptor interactions in platelet thrombus formation under flow. *Cell* 94: 657–666.
- Smitherman TC, Milam M, Woo J, Willerson JT, Frenkel EP (1981) Elevated beta thromboglobulin in peripheral venous blood of patients with acute myocardial ischemia: direct evidence for enhanced platelet reactivity in vivo. *Am J Cardiol* 48: 395–402.
- Langford EJ, Wainwright RJ, Martin JF (1996) Platelet activation in acute myocardial infarction and unstable angina is inhibited by nitric oxide donors. *Arterioscler Thromb Vasc Biol* 16: 51–55.
- Theroux P, Fuster V (1998) Acute coronary syndromes: unstable angina and non-Q-wave myocardial infarction. *Circulation* 97: 1195–1206.
- Vaitkus PT, Watkins MW, Witmer WT, Tracy RP, Sobel BE (1995) Characterization of platelet activation and thrombin generation accompanying percutaneous transluminal coronary angioplasty. *Coron Artery Dis* 6: 587–592.
- Hamm CW, Lorenz RL, Bleifeld W, Kupper W, Wober W, et al. (1987) Biochemical evidence of platelet activation in patients with persistent unstable angina. *J Am Coll Cardiol* 10: 998–1006.
- Dorn GW, 2nd, Liel N, Trask JL, Mais DE, Assey ME, et al. (1990) Increased platelet thromboxane A<sub>2</sub>/prostaglandin H<sub>2</sub> receptors in patients with acute myocardial infarction. *Circulation* 81: 212–218.
- Konopatskaya O, Gilio K, Harper MT, Zhao Y, Cosemans JM, et al. (2009) PKCalpha regulates platelet granule secretion and thrombus formation in mice. *J Clin Invest* 119: 399–407.
- Jennings LK (2009) Role of platelets in atherothrombosis. *Am J Cardiol* 103: 4A–10A.
- Bigalke B, Langer H, Geisler T, Lindemann S, Gawaz M (2007) Platelet glycoprotein VI: a novel marker for acute coronary syndrome. *Semin Thromb Hemost* 33: 179–184.
- Davi G, Patrono C (2007) Platelet activation and atherothrombosis. *N Engl J Med* 357: 2482–2494.
- Ouweland WH (2007) Platelet genomics and the risk of atherothrombosis. *J Thromb Haemost* 5 Suppl 1: 188–195
